# Supplementary material for: Effects of Long-Chain Polyunsaturated Fatty Acids in Combination with Lutein and Zeaxanthin on Episodic Memory in Healthy Older Adults
Source: MDPI journal article supplement (doi:10.3390/nu15132825), 2023-06-21
Supplement: s1 [file s1]

Supplementary Table S1. Fatty acid composition of the experimental supplement in Trial 1

| Fatty acid               |         | Placebo | LCPUFAs + LZ |
|--------------------------|---------|---------|--------------|
|                          |         | (%)     | (%)          |
| Palmitic acid            | 16:0    | 14.8    | 12.1         |
| Stearic acid             | 18:0    | 14.6    | 17.7         |
| Arachidic acid           | 20:0    | 0.6     | 0.7          |
| Behenic acid             | 22:0    | 0.2     | 0.9          |
| Lignoceric acid          | 24:0    | -       | 1.7          |
| Palmitoleic acid         | 16:1    | 0.7     | 1.8          |
| Oleic acid               | 18:1    | 60.5    | 6.2          |
| Eicosenoic acid          | 20:1    | 0.2     | 1.3          |
| Docosenoic acid          | 22:1    | -       | 1.0          |
| Tetracosenoic acid       | 24:1    | -       | 0.4          |
| Linoleic acid            | 18:2n-6 | 6.5     | 3.6          |
| Eicosadienoic acid       | 20:2n-6 | -       | 0.3          |
| Dihomo-g-linolenic acid  | 20:3n-6 | -       | 0.8          |
| ARA                      | 20:4n-6 | -       | 9.5          |
| Docosatetraenoic acid    | 22:4n-6 | -       | 0.3          |
| Docosapentaenoic acid    | 22:5n-6 | -       | 1.2          |
| $\alpha$ -Linolenic acid | 18:3n-3 | 0.6     | 0.3          |
| EPA                      | 20:5n-3 | -       | 7.5          |
| Docosapentaenoic acid    | 22:5n-3 | -       | 1.6          |
| DHA                      | 22:6n-3 | -       | 22.6         |
| Others                   |         | 1.3     | 8.5          |
| Total                    |         | 100.0   | 100.0        |

LCPUFAs, long-chain polyunsaturated fatty acids; LZ, lutein and zeaxanthin; ARA, arachidonic acid; DHA, docosahexaenoic acid; EPA, eicosapentaenoic acid.

Supplementary Table S2. Fatty acid composition of the experimental supplement in Trial 2

| Fatty acid               |         | Placebo | LCPUFAs + LZ |
|--------------------------|---------|---------|--------------|
|                          |         | (%)     | (%)          |
| Palmitic acid            | 16:0    | 14.8    | 11.3         |
| Stearic acid             | 18:0    | 13.8    | 14.8         |
| Arachidic acid           | 20:0    | 0.6     | 0.6          |
| Behenic acid             | 22:0    | 0.2     | 0.8          |
| Lignoceric acid          | 24:0    | -       | 1.6          |
| Palmitoleic acid         | 16:1    | 0.9     | 1.8          |
| Oleic acid               | 18:1    | 58.5    | 6.4          |
| Eicosenoic acid          | 20:1    | 0.2     | 1.5          |
| Docosenoic acid          | 22:1    | -       | 1.2          |
| Tetracosenoic acid       | 24:1    | -       | 0.5          |
| Linoleic acid            | 18:2n-6 | 9.5     | 4.1          |
| Eicosadienoic acid       | 20:2n-6 | -       | 0.3          |
| Dihomo-g-linolenic acid  | 20:3n-6 | -       | 1.0          |
| ARA                      | 20:4n-6 | -       | 9.9          |
| Docosatetraenoic acid    | 22:4n-6 | -       | 0.3          |
| Docosapentaenoic acid    | 22:5n-6 | -       | 1.4          |
| $\alpha$ -Linolenic acid | 18:3n-3 | 0.5     | 0.3          |
| EPA                      | 20:5n-3 | -       | 8.0          |
| Docosapentaenoic acid    | 22:5n-3 | -       | 1.7          |
| DHA                      | 22:6n-3 | -       | 24.7         |
| Others                   |         | 1.0     | 7.8          |
| Total                    |         | 100.0   | 100.0        |

LCPUFAs, long-chain polyunsaturated fatty acids; LZ, lutein and zeaxanthin; ARA, arachidonic acid; DHA, docosahexaenoic acid; EPA, eicosapentaenoic acid.

Supplementary Table S3. Dietary assessment by group during the intervention in Trial 1

|                      | Group        | Baseline |   |     | 12 Weeks |   |     | $\Delta$<br>(12-Week Baseline) |   |     | 24 Weeks |   |     | $\Delta$<br>(24-Week Baseline) |   |     |
|----------------------|--------------|----------|---|-----|----------|---|-----|--------------------------------|---|-----|----------|---|-----|--------------------------------|---|-----|
| Energy (kcal/day)    | Placebo      | 1592     | ± | 68  | 1527     | ± | 56  | -57                            | ± | 48  | 1535     | ± | 54  | -56                            | ± | 55  |
|                      | LCPUFAs + LZ | 1660     | ± | 84  | 1664     | ± | 117 | 8                              | ± | 68  | 1671     | ± | 87  | 34                             | ± | 50  |
| Carbohydrate (g/day) | Placebo      | 201      | ± | 10  | 198      | ± | 9   | -1                             | ± | 8   | 201      | ± | 7   | -1                             | ± | 8   |
|                      | LCPUFAs + LZ | 201      | ± | 11  | 210      | ± | 13  | 11                             | ± | 9   | 213      | ± | 11  | 14                             | ± | 8   |
| Protein (g/day)      | Placebo      | 60       | ± | 3   | 59       | ± | 3   | -1                             | ± | 2   | 60       | ± | 3   | 0                              | ± | 2   |
|                      | LCPUFAs + LZ | 67       | ± | 4   | 65       | ± | 5   | -1                             | ± | 3   | 67       | ± | 4   | 2                              | ± | 2   |
| Fat (g/day)          | Placebo      | 53       | ± | 3   | 49       | ± | 3   | -3                             | ± | 2   | 49       | ± | 3   | -4                             | ± | 2   |
|                      | LCPUFAs + LZ | 58       | ± | 4   | 56       | ± | 5   | -3                             | ± | 3   | 55       | ± | 4   | -2                             | ± | 2   |
| LA (mg/day)          | Placebo      | 10327    | ± | 566 | 9792     | ± | 547 | -412                           | ± | 451 | 9706     | ± | 535 | -621                           | ± | 449 |
|                      | LCPUFAs + LZ | 11533    | ± | 740 | 10668    | ± | 892 | -950                           | ± | 579 | 10912    | ± | 809 | -467                           | ± | 465 |
| ALA (mg/day)         | Placebo      | 1647     | ± | 96  | 1552     | ± | 93  | -80                            | ± | 82  | 1518     | ± | 98  | -129                           | ± | 82  |
|                      | LCPUFAs + LZ | 1849     | ± | 124 | 1681     | ± | 151 | -178                           | ± | 98  | 1709     | ± | 142 | -108                           | ± | 83  |
| ARA (mg/day)         | Placebo      | 160      | ± | 9   | 159      | ± | 10  | -1                             | ± | 9   | 165      | ± | 11  | 6                              | ± | 9   |
|                      | LCPUFAs + LZ | 184      | ± | 13  | 183      | ± | 16  | -3                             | ± | 10  | 188      | ± | 13  | 5                              | ± | 7   |
| DHA (mg/day)         | Placebo      | 444      | ± | 45  | 449      | ± | 43  | 1                              | ± | 40  | 470      | ± | 41  | 26                             | ± | 36  |
|                      | LCPUFAs + LZ | 522      | ± | 49  | 485      | ± | 48  | -32                            | ± | 35  | 533      | ± | 48  | 22                             | ± | 28  |
| EPA (mg/day)         | Placebo      | 251      | ± | 30  | 255      | ± | 28  | 1                              | ± | 25  | 263      | ± | 26  | 12                             | ± | 23  |
|                      | LCPUFAs + LZ | 294      | ± | 30  | 268      | ± | 29  | -20                            | ± | 23  | 296      | ± | 30  | 11                             | ± | 19  |

Mean ± SE

Placebo group (n = 36 at baseline, n = 35 at week 12, and n = 36 at week 24).

LCPUFAs + LZ group (n = 35 at baseline, n = 34 at week 12, and n = 34 at week 24).

There were no significant differences between groups at the baseline and in change ( $\Delta$ ) (unpaired Student's *t*-test).

There were no significant differences between the baseline and 12-week, and in the baseline and 24-week data in each group (paired *t*-test).

LCPUFAs, long-chain polyunsaturated fatty acids; LZ, lutein and zeaxanthin; LA, linoleic acid; ALA,  $\alpha$ -linolenic acid;

ARA, arachidonic acid; DHA, docosahexaenoic acid; EPA, eicosapentaenoic acid.

Supplementary Table S4. Fatty acid composition in plasma phospholipid by group during the intervention in Trial 1

| Group   |              | Baseline |   |     | 12 Weeks |   |     | Δ<br>(12-Week Baseline) |      |   |     | 24 Weeks |      |   | Δ<br>(24-Week Baseline) |      |     |     |     |
|---------|--------------|----------|---|-----|----------|---|-----|-------------------------|------|---|-----|----------|------|---|-------------------------|------|-----|-----|-----|
| PA (%)  | Placebo      | 27.8     | ± | 0.2 | 27.4     | ± | 0.2 | **                      | −0.4 | ± | 0.1 |          | 27.9 | ± | 0.2                     | 0.1  | ±   | 0.2 |     |
|         | LCPUFAs + LZ | 27.4     | ± | 0.2 | 27.4     | ± | 0.2 |                         | 0.0  | ± | 0.1 | #        | 27.6 | ± | 0.2                     | 0.2  | ±   | 0.2 |     |
| SA (%)  | Placebo      | 14.2     | ± | 0.2 | 14.4     | ± | 0.2 |                         | 0.2  | ± | 0.1 |          | 14.3 | ± | 0.2                     | 0.1  | ±   | 0.1 |     |
|         | LCPUFAs + LZ | 14.5     | ± | 0.1 | 14.5     | ± | 0.2 |                         | 0.0  | ± | 0.1 |          | 14.7 | ± | 0.2                     | 0.2  | ±   | 0.1 |     |
| OA (%)  | Placebo      | 9.5      | ± | 0.2 | 9.7      | ± | 0.2 |                         | 0.1  | ± | 0.2 |          | 9.7  | ± | 0.3                     | 0.2  | ±   | 0.2 |     |
|         | LCPUFAs + LZ | 9.3      | ± | 0.2 | 9.0      | ± | 0.2 | **                      | −0.4 | ± | 0.2 | #        | 9.1  | ± | 0.2                     | −0.2 | ±   | 0.2 |     |
| LA (%)  | Placebo      | 21.4     | ± | 0.4 | 21.5     | ± | 0.4 |                         | 0.2  | ± | 0.4 |          | 21.6 | ± | 0.4                     | 0.2  | ±   | 0.4 |     |
|         | LCPUFAs + LZ | 21.0     | ± | 0.5 | 20.1     | ± | 0.5 | **                      | −0.9 | ± | 0.3 | #        | 20.3 | ± | 0.4                     | −0.6 | ±   | 0.4 |     |
| ARA (%) | Placebo      | 9.0      | ± | 0.2 | 9.2      | ± | 0.3 |                         | 0.2  | ± | 0.2 |          | 9.3  | ± | 0.3                     | 0.3  | ±   | 0.2 |     |
|         | LCPUFAs + LZ | 9.5      | ± | 0.2 | 10.2     | ± | 0.3 | **                      | 0.7  | ± | 0.2 | #        | 10.2 | ± | 0.3                     | **   | 0.7 | ±   | 0.2 |
| DHA (%) | Placebo      | 6.5      | ± | 0.3 | 6.5      | ± | 0.3 |                         | 0.0  | ± | 0.2 |          | 6.5  | ± | 0.2                     | 0.0  | ±   | 0.2 |     |
|         | LCPUFAs + LZ | 6.6      | ± | 0.2 | 7.5      | ± | 0.2 | **                      | 1.0  | ± | 0.2 | ##       | 7.4  | ± | 0.2                     | **   | 0.8 | ±   | 0.2 |
| EPA (%) | Placebo      | 1.8      | ± | 0.2 | 1.9      | ± | 0.2 |                         | 0.1  | ± | 0.2 |          | 1.9  | ± | 0.2                     | 0.1  | ±   | 0.2 |     |
|         | LCPUFAs + LZ | 1.9      | ± | 0.2 | 2.3      | ± | 0.2 | *                       | 0.4  | ± | 0.2 |          | 2.3  | ± | 0.1                     | *    | 0.3 | ±   | 0.1 |

Mean ± SE.

Placebo group (n = 36 at baseline, n = 35 at week 12, and n = 36 at week 24).

LCPUFAs + LZ group (n = 35 at baseline, n = 34 at week 12, and n = 34 at week 24).

There was no significant difference between groups at the baseline (unpaired Student's *t*-test).

\**p* < 0.05 and \*\**p* < 0.01 vs. baseline (paired *t*-test). #*p* < 0.05 and ##*p* < 0.01 vs. the placebo group (unpaired Student's *t*-test).

LCPUFAs, long-chain polyunsaturated fatty acids; LZ, lutein and zeaxanthin; PA, palmitic acid; SA, stearic acid; OA, oleic acid; LA, linoleic acid;

ARA, arachidonic acid; DHA, docosahexaenoic acid; EPA, eicosapentaenoic acid.

Supplementary Table S5. Lutein and zeaxanthin concentration in serum by group during the intervention in Trial 1

|                                 |              | Baseline |       |      | 12 Weeks |       |      | $\Delta$<br>(12-Week Baseline) |       |       | 24 Weeks |       |      | $\Delta$<br>(24-Week Baseline) |       |      |
|---------------------------------|--------------|----------|-------|------|----------|-------|------|--------------------------------|-------|-------|----------|-------|------|--------------------------------|-------|------|
| Lutein ( $\mu\text{g/mL}$ )     | Placebo      | 0.23     | $\pm$ | 0.02 | 0.24     | $\pm$ | 0.02 | 0.01                           | $\pm$ | 0.02  | 0.24     | $\pm$ | 0.02 | 0.02                           | $\pm$ | 0.01 |
|                                 | LCPUFAs + LZ | 0.27     | $\pm$ | 0.02 | 0.47     | $\pm$ | 0.03 | **                             | 0.20  | $\pm$ | 0.03     | ##    | 0.45 | $\pm$                          | 0.03  | **   |
| Zeaxanthin ( $\mu\text{g/mL}$ ) | Placebo      | 0.12     | $\pm$ | 0.01 | 0.13     | $\pm$ | 0.01 | 0.01                           | $\pm$ | 0.01  | 0.12     | $\pm$ | 0.01 | 0.00                           | $\pm$ | 0.01 |
|                                 | LCPUFAs + LZ | 0.14     | $\pm$ | 0.01 | 0.20     | $\pm$ | 0.01 | **                             | 0.06  | $\pm$ | 0.01     | #     | 0.19 | $\pm$                          | 0.01  | **   |

Mean  $\pm$  SE.

Placebo group (n = 36 at baseline, n = 35 at week 12, and n = 36 at week 24).

LCPUFAs + LZ group (n = 35 at baseline, n = 34 at week 12, and n = 34 at week 24).

There was no significant difference between groups at the baseline (unpaired Student's *t*-test).

\*\**p* < 0.01 vs. baseline (paired *t*-test). #*p* < 0.05 and ##*p* < 0.01 vs. the placebo group (unpaired Student's *t*-test).

LCPUFAs, long-chain polyunsaturated fatty acids; LZ, lutein and zeaxanthin.

Supplementary Table S6. Episodic memory tests by group at the baseline and at 24 Weeks in Trial 1

|                  | Group        | Baseline |           | 24 Weeks |              | $\Delta$ |           | $\Delta$ adjusted |           |
|------------------|--------------|----------|-----------|----------|--------------|----------|-----------|-------------------|-----------|
| Episodic memory  |              |          |           |          |              |          |           |                   |           |
| Composite memory | Placebo      | 94.9     | $\pm$ 1.2 | 95.5     | $\pm$ 1.3    | 0.5      | $\pm$ 1.0 | 0.5               | $\pm$ 1.0 |
|                  | LCPUFAs + LZ | 95.1     | $\pm$ 1.0 | 97.4     | $\pm$ 1.3    | 2.2      | $\pm$ 1.1 | 2.3               | $\pm$ 1.0 |
| Verbal memory    | Placebo      | 50.0     | $\pm$ 0.7 | 50.9     | $\pm$ 0.7    | 0.9      | $\pm$ 0.8 | 0.7               | $\pm$ 0.6 |
|                  | LCPUFAs + LZ | 50.9     | $\pm$ 0.8 | 52.7     | $\pm$ 0.8 ** | 1.8      | $\pm$ 0.6 | 2.0               | $\pm$ 0.6 |
| Visual memory    | Placebo      | 44.9     | $\pm$ 0.8 | 44.6     | $\pm$ 0.9    | -0.3     | $\pm$ 1.0 | -0.1              | $\pm$ 0.9 |
|                  | LCPUFAs + LZ | 44.2     | $\pm$ 0.6 | 44.7     | $\pm$ 0.9    | 0.4      | $\pm$ 1.0 | 0.2               | $\pm$ 0.9 |

Mean  $\pm$  SE

Placebo (n = 36) and LCPUFAs + LZ (n = 34) groups.

For participants with missing values in episodic memory scores at week 24, baseline values were also removed.

There was no significant difference between groups at the baseline (unpaired Student's *t* -test).

\*\**p* < 0.01 vs. baseline (paired *t* -test).

There was no significant difference in the changes ( $\Delta$ ) and changes adjusted by baseline ( $\Delta$  adjusted) between groups (unpaired Student's *t* -test or analysis of covariance by baseline score).

LCPUFAs, long-chain polyunsaturated fatty acids; LZ, lutein and zeaxanthin.

Supplementary Table S7. Baseline characteristics of participants for subgroup analysis in Trial 1

|                                       | Placebo |   |     | LCPUFAs + LZ |   |     | <i>p</i> |
|---------------------------------------|---------|---|-----|--------------|---|-----|----------|
| Age (years) <sup>a</sup>              | 64.9    | ± | 1.3 | 66.6         | ± | 1.6 | 0.415    |
| Sex (M/F) <sup>b</sup>                | 9/7     |   |     | 9/9          |   |     | 0.715    |
| BMI (kg/m <sup>2</sup> ) <sup>a</sup> | 22.2    | ± | 0.4 | 23.5         | ± | 0.8 | 0.173    |
| Education (years) <sup>a</sup>        | 14.4    | ± | 0.5 | 14.2         | ± | 0.5 | 0.788    |
| MoCA-J <sup>a</sup>                   | 21.0    | ± | 0.2 | 20.3         | ± | 0.3 | 0.087    |
| Composite memory <sup>a</sup>         | 94.4    | ± | 1.8 | 91.9         | ± | 1.4 | 0.288    |
| Verbal memory <sup>a</sup>            | 49.2    | ± | 1.2 | 48.5         | ± | 1.2 | 0.673    |
| Visual memory <sup>a</sup>            | 45.1    | ± | 1.2 | 43.4         | ± | 0.5 | 0.179    |
| ARA in plasma PL (%) <sup>a</sup>     | 8.8     | ± | 0.3 | 9.6          | ± | 0.3 | 0.087    |
| DHA in plasma PL (%) <sup>a</sup>     | 6.6     | ± | 0.4 | 6.5          | ± | 0.3 | 0.828    |
| EPA in plasma PL (%) <sup>a</sup>     | 1.9     | ± | 0.2 | 1.8          | ± | 0.2 | 0.800    |

Mean ± SE

Placebo (n = 14 for episodic memory scores, n = 16 for all other data) and LCPUFAs + LZ (n = 18 for all data) groups.

For participants with missing values in episodic memory scores at week 12, baseline values were also removed.

There was no significant difference between groups in the baseline data for subgroup analysis (MoCA-J < 23) (<sup>a</sup>unpaired Student's *t*-test, <sup>b</sup>chi-square test).

PPS, per-protocol set; LCPUFAs, long-chain polyunsaturated fatty acids; LZ, lutein and zeaxanthin; BMI, body mass index;

MoCA-J, Montreal Cognitive Assessment Japanese version; ARA, arachidonic acid; DHA, docosahexaenoic acid;

EPA, eicosapentaenoic acid; PL, phospholipids

Supplementary Table S8. Dietary assessment by group for subgroup analysis during the intervention in Trial 1

|                      | Group        | Baseline |       |     | 12 Weeks |       |      | $\Delta$ |       |     |
|----------------------|--------------|----------|-------|-----|----------|-------|------|----------|-------|-----|
| Energy (kcal/day)    | Placebo      | 1587     | $\pm$ | 117 | 1505     | $\pm$ | 93   | -64      | $\pm$ | 83  |
|                      | LCPUFAs + LZ | 1702     | $\pm$ | 130 | 1699     | $\pm$ | 164  | -3       | $\pm$ | 85  |
| Carbohydrate (g/day) | Placebo      | 204      | $\pm$ | 17  | 194      | $\pm$ | 15   | -6       | $\pm$ | 11  |
|                      | LCPUFAs + LZ | 198      | $\pm$ | 16  | 206      | $\pm$ | 17   | 8        | $\pm$ | 9   |
| Protein (g/day)      | Placebo      | 57       | $\pm$ | 5   | 58       | $\pm$ | 4    | 1        | $\pm$ | 4   |
|                      | LCPUFAs + LZ | 70       | $\pm$ | 6   | 70       | $\pm$ | 8    | -1       | $\pm$ | 5   |
| Fat (g/day)          | Placebo      | 52       | $\pm$ | 5   | 48       | $\pm$ | 4    | -3       | $\pm$ | 4   |
|                      | LCPUFAs + LZ | 62       | $\pm$ | 5   | 60       | $\pm$ | 8    | -2       | $\pm$ | 4   |
| LA (mg/day)          | Placebo      | 10572    | $\pm$ | 935 | 9945     | $\pm$ | 796  | -360     | $\pm$ | 860 |
|                      | LCPUFAs + LZ | 12213    | $\pm$ | 969 | 11606    | $\pm$ | 1418 | -608     | $\pm$ | 838 |
| ALA (mg/day)         | Placebo      | 1748     | $\pm$ | 164 | 1602     | $\pm$ | 130  | -117     | $\pm$ | 157 |
|                      | LCPUFAs + LZ | 1978     | $\pm$ | 165 | 1867     | $\pm$ | 242  | -111     | $\pm$ | 146 |
| ARA (mg/day)         | Placebo      | 145      | $\pm$ | 14  | 143      | $\pm$ | 12   | -2       | $\pm$ | 16  |
|                      | LCPUFAs + LZ | 193      | $\pm$ | 16  | # 194    | $\pm$ | 23   | 1        | $\pm$ | 13  |
| DHA (mg/day)         | Placebo      | 370      | $\pm$ | 49  | 393      | $\pm$ | 39   | 17       | $\pm$ | 53  |
|                      | LCPUFAs + LZ | 596      | $\pm$ | 72  | # 561    | $\pm$ | 75   | -35      | $\pm$ | 57  |
| EPA (mg/day)         | Placebo      | 207      | $\pm$ | 30  | 224      | $\pm$ | 24   | 11       | $\pm$ | 33  |
|                      | LCPUFAs + LZ | 345      | $\pm$ | 45  | # 319    | $\pm$ | 47   | -25      | $\pm$ | 38  |

Mean  $\pm$  SE

Placebo (n = 16 at baseline, n = 15 at week 12) and LCPUFAs + LZ (n = 18 at baseline and week 12) groups.

#*p* < 0.05 vs. the placebo group (unpaired Student's *t* -test).

There was no significant difference between the baseline and 12-week data in each group (paired *t* -test).

There was no significant difference between groups in change ( $\Delta$ ) (unpaired Student's *t* -test).

LCPUFAs, long-chain polyunsaturated fatty acids; LZ, lutein and zeaxanthin; LA, linoleic acid; ALA,  $\alpha$ -linolenic acid;

ARA, arachidonic acid; DHA, docosahexaenoic acid; EPA, eicosapentaenoic acid.



Supplementary Table S9. Fatty acid composition of plasma phospholipid by group for subgroup analysis during the intervention in Trial 1

|         | Group        | Baseline |   |     | 12 Weeks |      |   | Δ   |      |      |     |     |
|---------|--------------|----------|---|-----|----------|------|---|-----|------|------|-----|-----|
| PA (%)  | Placebo      | 28.0     | ± | 0.3 |          | 27.9 | ± | 0.3 | −0.2 | ±    | 0.2 |     |
|         | LCPUFAs + LZ | 27.2     | ± | 0.3 | #        | 27.0 | ± | 0.3 | −0.1 | ±    | 0.2 |     |
| SA (%)  | Placebo      | 13.8     | ± | 0.2 |          | 13.9 | ± | 0.3 | 0.1  | ±    | 0.1 |     |
|         | LCPUFAs + LZ | 14.8     | ± | 0.2 | ##       | 14.8 | ± | 0.3 | 0.1  | ±    | 0.2 |     |
| OA (%)  | Placebo      | 9.6      | ± | 0.2 |          | 10.0 | ± | 0.3 | 0.4  | ±    | 0.2 |     |
|         | LCPUFAs + LZ | 9.5      | ± | 0.3 |          | 8.9  | ± | 0.3 | **   | −0.6 | ±   | 0.2 |
| LA (%)  | Placebo      | 21.5     | ± | 0.7 |          | 21.9 | ± | 0.6 |      | 0.7  | ±   | 0.5 |
|         | LCPUFAs + LZ | 21.0     | ± | 0.6 |          | 20.3 | ± | 0.6 |      | −0.7 | ±   | 0.4 |
| ARA (%) | Placebo      | 8.8      | ± | 0.3 |          | 8.8  | ± | 0.4 |      | 0.0  | ±   | 0.2 |
|         | LCPUFAs + LZ | 9.6      | ± | 0.3 |          | 10.6 | ± | 0.4 | **   | 1.0  | ±   | 0.2 |
| DHA (%) | Placebo      | 6.6      | ± | 0.4 |          | 6.4  | ± | 0.4 |      | −0.3 | ±   | 0.2 |
|         | LCPUFAs + LZ | 6.5      | ± | 0.3 |          | 7.4  | ± | 0.3 | **   | 0.9  | ±   | 0.2 |
| EPA (%) | Placebo      | 1.9      | ± | 0.2 |          | 1.7  | ± | 0.2 |      | −0.3 | ±   | 0.3 |
|         | LCPUFAs + LZ | 1.8      | ± | 0.2 |          | 2.2  | ± | 0.2 |      | 0.4  | ±   | 0.2 |

Mean  $\pm$  SE.

Placebo (n = 16 at baseline, n = 15 at week 12) and LCPUFAs + LZ (n = 18 at baseline and week 12) groups.

\*\* $p$  < 0.01 vs. baseline (paired  $t$ -test). # $p$  < 0.05 and ## $p$  < 0.01 vs. the placebo group at the baseline or in change ( $\Delta$ ) (unpaired Student's  $t$ -test).

LCPUFAs, long-chain polyunsaturated fatty acids; LZ, lutein and zeaxanthin; PA, palmitic acid; SA, stearic acid; OA, oleic acid;

LA, linoleic acid; ARA, arachidonic acid; DHA, docosahexaenoic acid; EPA, eicosapentaenoic acid.

Supplementary Table S10. Lutein and zeaxanthin concentration in serum by group for subgroup analysis during the intervention in Trial 1

|                                 | Group        | Baseline |       |      | 12 Weeks |       |      |    | $\Delta$ |       |         |
|---------------------------------|--------------|----------|-------|------|----------|-------|------|----|----------|-------|---------|
| Lutein ( $\mu\text{g/mL}$ )     | Placebo      | 0.21     | $\pm$ | 0.02 | 0.25     | $\pm$ | 0.03 |    | 0.03     | $\pm$ | 0.03    |
|                                 | LCPUFAs + LZ | 0.27     | $\pm$ | 0.02 | 0.49     | $\pm$ | 0.05 | ** | 0.22     | $\pm$ | 0.04 ## |
| Zeaxanthin ( $\mu\text{g/mL}$ ) | Placebo      | 0.11     | $\pm$ | 0.01 | 0.13     | $\pm$ | 0.01 |    | 0.02     | $\pm$ | 0.02    |
|                                 | LCPUFAs + LZ | 0.14     | $\pm$ | 0.01 | 0.20     | $\pm$ | 0.02 | ** | 0.06     | $\pm$ | 0.02    |

Mean  $\pm$  SE.

Placebo (n = 16 at the baseline, n = 15 at week 12) and LCPUFAs + LZ (n = 18 at the baseline and week 12) groups.

There was no significant difference between groups at the baseline (unpaired Student's *t* -test).

\*\**p* < 0.01 vs. baseline (paired *t* -test). ##*p* < 0.01 vs. the placebo group (unpaired Student's *t* -test).

LCPUFAs, long-chain polyunsaturated fatty acids; LZ, lutein and zeaxanthin.

Supplementary Table S11. Episodic memory tests by group during the intervention for subgroup analysis in Trial 1

|                  | Group        | Baseline |           | 12 Weeks |           |   | $\Delta$ |           | $\Delta$ adjusted |           |              |
|------------------|--------------|----------|-----------|----------|-----------|---|----------|-----------|-------------------|-----------|--------------|
| Episodic memory  |              |          |           |          |           |   |          |           |                   |           |              |
| Composite memory | Placebo      | 94.4     | $\pm$ 1.8 | 89.6     | $\pm$ 2.1 | * | -4.8     | $\pm$ 1.8 | -4.5              | $\pm$ 1.7 |              |
|                  | LCPUFAs + LZ | 91.9     | $\pm$ 1.4 | 95.4     | $\pm$ 1.9 | * | 3.4      | $\pm$ 1.4 | ##                | 3.2       | $\pm$ 1.5 ## |
| Verbal memory    | Placebo      | 49.2     | $\pm$ 1.2 | 47.1     | $\pm$ 1.4 |   | -2.1     | $\pm$ 1.3 |                   | -2        | $\pm$ 1.1    |
|                  | LCPUFAs + LZ | 48.5     | $\pm$ 1.2 | 50.8     | $\pm$ 1.3 | * | 2.3      | $\pm$ 0.8 | ##                | 2.2       | $\pm$ 1.0 ## |
| Visual memory    | Placebo      | 45.1     | $\pm$ 1.2 | 42.4     | $\pm$ 1.3 | * | -2.7     | $\pm$ 1.2 |                   | -2.4      | $\pm$ 1.1    |
|                  | LCPUFAs + LZ | 43.4     | $\pm$ 0.5 | 44.6     | $\pm$ 1.0 |   | 1.2      | $\pm$ 0.9 | #                 | 0.9       | $\pm$ 1.0 #  |

Mean  $\pm$  SE

Placebo (n = 14) and LCPUFAs + LZ (n = 18) groups.

For participants with missing values in episodic memory scores at week 12, baseline values were also removed.

There was no significant difference between groups at the baseline (unpaired Student's *t* -test).

\**p* < 0.05 vs. baseline (paired *t* -test).

#*p* < 0.05 and ##*p* < 0.01 vs. placebo (unpaired Student's *t* -test or analysis of covariance by baseline score).

LCPUFAs, long-chain polyunsaturated fatty acids; LZ, lutein and zeaxanthin.

Supplementary Table S12. Dietary assessment by group during the intervention in Trial 2

|                      | Group        | Baseline |       |     | 12 Weeks |       |     |    | $\Delta$ |       |     |
|----------------------|--------------|----------|-------|-----|----------|-------|-----|----|----------|-------|-----|
| Energy (kcal/day)    | Placebo      | 1710     | $\pm$ | 56  | 1614     | $\pm$ | 59  | ** | -96      | $\pm$ | 34  |
|                      | LCPUFAs + LZ | 1695     | $\pm$ | 58  | 1576     | $\pm$ | 56  | ** | -119     | $\pm$ | 35  |
| Carbohydrate (g/day) | Placebo      | 224      | $\pm$ | 8   | 211      | $\pm$ | 8   | *  | -13      | $\pm$ | 5   |
|                      | LCPUFAs + LZ | 220      | $\pm$ | 9   | 201      | $\pm$ | 8   | ** | -19      | $\pm$ | 6   |
| Protein (g/day)      | Placebo      | 68       | $\pm$ | 3   | 65       | $\pm$ | 3   |    | -3       | $\pm$ | 2   |
|                      | LCPUFAs + LZ | 67       | $\pm$ | 2   | 64       | $\pm$ | 2   | *  | -3       | $\pm$ | 1   |
| Fat (g/day)          | Placebo      | 55       | $\pm$ | 2   | 51       | $\pm$ | 2   | ** | -4       | $\pm$ | 1   |
|                      | LCPUFAs + LZ | 55       | $\pm$ | 2   | 52       | $\pm$ | 2   | *  | -3       | $\pm$ | 1   |
| LA (mg/day)          | Placebo      | 10397    | $\pm$ | 441 | 9823     | $\pm$ | 429 | *  | -575     | $\pm$ | 272 |
|                      | LCPUFAs + LZ | 10488    | $\pm$ | 399 | 10053    | $\pm$ | 405 |    | -436     | $\pm$ | 273 |
| ALA (mg/day)         | Placebo      | 1647     | $\pm$ | 78  | 1533     | $\pm$ | 73  | *  | -114     | $\pm$ | 47  |
|                      | LCPUFAs + LZ | 1648     | $\pm$ | 70  | 1573     | $\pm$ | 66  |    | -76      | $\pm$ | 50  |
| ARA (mg/day)         | Placebo      | 182      | $\pm$ | 7   | 173      | $\pm$ | 9   |    | -8       | $\pm$ | 6   |
|                      | LCPUFAs + LZ | 175      | $\pm$ | 8   | 168      | $\pm$ | 8   |    | -7       | $\pm$ | 5   |
| DHA (mg/day)         | Placebo      | 516      | $\pm$ | 34  | 519      | $\pm$ | 39  |    | 3        | $\pm$ | 27  |
|                      | LCPUFAs + LZ | 481      | $\pm$ | 27  | 466      | $\pm$ | 25  |    | -15      | $\pm$ | 19  |
| EPA (mg/day)         | Placebo      | 296      | $\pm$ | 22  | 300      | $\pm$ | 26  |    | 4        | $\pm$ | 18  |
|                      | LCPUFAs + LZ | 274      | $\pm$ | 17  | 264      | $\pm$ | 16  |    | -10      | $\pm$ | 12  |

Mean  $\pm$  SE

Placebo (n = 87) and LCPUFAs + LZ (n = 90) groups.

For participants with missing values in BDHQ at the baseline or week 12, the other values were also removed.

There was no significant difference between groups at the baseline and in change ( $\Delta$ ) (unpaired Student's *t* -test).

\**p* < 0.05 and \*\**p* < 0.01 vs. baseline (paired *t* -test).

LCPUFAs, long-chain polyunsaturated fatty acids; LZ, lutein and zeaxanthin; LA, linoleic acid; ALA,  $\alpha$ -linolenic acid;

ARA, arachidonic acid; DHA, docosahexaenoic acid; EPA, eicosapentaenoic acid.

Supplementary Table S13. Baseline characteristics of the participants for subgroup analysis in Trial 2

|                                             | Placebo |   |     | LCPUFAs + LZ |   |     | <i>p</i> |
|---------------------------------------------|---------|---|-----|--------------|---|-----|----------|
| Age (years) <sup>a</sup>                    | 67.2    | ± | 1.2 | 66.1         | ± | 1.1 | 0.493    |
| Sex (M/F) <sup>b</sup>                      | 17/8    |   |     | 21/14        |   |     | 0.526    |
| Residential area (Tokyo/Osaka) <sup>b</sup> | 9/16    |   |     | 16/19        |   |     | 0.451    |
| BMI (kg/m <sup>2</sup> ) <sup>a</sup>       | 22.9    | ± | 0.4 | 23.0         | ± | 0.6 | 0.958    |
| Education (years) <sup>a</sup>              | 15.0    | ± | 0.4 | 15.2         | ± | 0.3 | 0.648    |
| MoCA-J <sup>a</sup>                         | 20.2    | ± | 0.3 | 20.6         | ± | 0.2 | 0.239    |
| Composite memory <sup>a</sup>               | 93.5    | ± | 2.0 | 91.3         | ± | 1.5 | 0.380    |
| Verbal memory <sup>a</sup>                  | 49.0    | ± | 1.2 | 47.6         | ± | 0.9 | 0.371    |
| Visual memory <sup>a</sup>                  | 44.1    | ± | 1.1 | 43.7         | ± | 0.8 | 0.744    |
| ARA in plasma PL (%) <sup>a</sup>           | 10.1    | ± | 0.4 | 10.0         | ± | 0.3 | 0.913    |
| DHA in plasma PL (%) <sup>a</sup>           | 6.5     | ± | 0.4 | 6.6          | ± | 0.3 | 0.928    |
| EPA in plasma PL (%) <sup>a</sup>           | 2.5     | ± | 0.4 | 2.0          | ± | 0.2 | 0.225    |

Mean ± SE

Placebo group (n = 24 for composite and verbal memory scores, n = 25 for all other data).

LCPUFAs + LZ group (n = 34 for composite and verbal memory score, n = 35 for all other data).

For participants with missing values in episodic memory scores at week 12, baseline values were also removed.

There was no significant difference between groups in the baseline data for subgroup analysis (MoCA-J < 23) in Trial 2 (<sup>a</sup>unpaired Student's *t*-test, <sup>b</sup>chi-square test).

PPS, per-protocol set; LCPUFAs, long-chain polyunsaturated fatty acids; LZ, lutein and zeaxanthin; BMI, body mass index;

MoCA-J, Montreal Cognitive Assessment Japanese version; ARA, arachidonic acid; DHA, docosahexaenoic acid; EPA, eicosapentaenoic acid; PL, phospholipids.

Supplementary Table S14. Dietary assessment by group for subgroup analysis during the intervention in Trial 2

|                      | Group        | Baseline |       |     | 12 Weeks |       |     |   | $\Delta$ |           |
|----------------------|--------------|----------|-------|-----|----------|-------|-----|---|----------|-----------|
| Energy (kcal/day)    | Placebo      | 1796     | $\pm$ | 129 | 1636     | $\pm$ | 139 | * | -160     | $\pm$ 68  |
|                      | LCPUFAs + LZ | 1727     | $\pm$ | 89  | 1604     | $\pm$ | 89  | * | -123     | $\pm$ 57  |
| Carbohydrate (g/day) | Placebo      | 235      | $\pm$ | 19  | 214      | $\pm$ | 20  | * | -21      | $\pm$ 10  |
|                      | LCPUFAs + LZ | 232      | $\pm$ | 14  | 208      | $\pm$ | 12  | * | -24      | $\pm$ 10  |
| Protein (g/day)      | Placebo      | 74       | $\pm$ | 7   | 68       | $\pm$ | 7   |   | -6       | $\pm$ 3   |
|                      | LCPUFAs + LZ | 67       | $\pm$ | 4   | 66       | $\pm$ | 4   |   | -1       | $\pm$ 2   |
| Fat (g/day)          | Placebo      | 56       | $\pm$ | 4   | 49       | $\pm$ | 5   | * | -7       | $\pm$ 3   |
|                      | LCPUFAs + LZ | 54       | $\pm$ | 4   | 52       | $\pm$ | 4   |   | -2       | $\pm$ 2   |
| LA (mg/day)          | Placebo      | 10680    | $\pm$ | 896 | 10020    | $\pm$ | 937 |   | -660     | $\pm$ 538 |
|                      | LCPUFAs + LZ | 10454    | $\pm$ | 627 | 9949     | $\pm$ | 710 |   | -504     | $\pm$ 452 |
| ALA (mg/day)         | Placebo      | 1688     | $\pm$ | 152 | 1590     | $\pm$ | 150 |   | -98      | $\pm$ 89  |
|                      | LCPUFAs + LZ | 1615     | $\pm$ | 107 | 1545     | $\pm$ | 122 |   | -71      | $\pm$ 82  |
| ARA (mg/day)         | Placebo      | 195      | $\pm$ | 15  | 178      | $\pm$ | 19  |   | -17      | $\pm$ 13  |
|                      | LCPUFAs + LZ | 176      | $\pm$ | 15  | 174      | $\pm$ | 13  |   | -2       | $\pm$ 10  |
| DHA (mg/day)         | Placebo      | 593      | $\pm$ | 90  | 583      | $\pm$ | 107 |   | -10      | $\pm$ 66  |
|                      | LCPUFAs + LZ | 416      | $\pm$ | 42  | 470      | $\pm$ | 46  |   | 54       | $\pm$ 27  |
| EPA (mg/day)         | Placebo      | 349      | $\pm$ | 61  | 347      | $\pm$ | 70  |   | -2       | $\pm$ 42  |
|                      | LCPUFAs + LZ | 227      | $\pm$ | 27  | # 264    | $\pm$ | 29  | * | 37       | $\pm$ 18  |

Mean  $\pm$  SE

Placebo (n = 24) and LCPUFAs + LZ (n = 34) groups.

For participants with missing values in BDHQ at the baseline or week 12, the other values were also removed.

# $p$  < 0.05 vs. the placebo group at the baseline (unpaired Student's  $t$ -test). \* $p$  < 0.05 vs. baseline (paired  $t$ -test).

There was no significant difference between groups in change ( $\Delta$ ) (unpaired Student's  $t$ -test).

LCPUFAs, long-chain polyunsaturated fatty acids; LZ, lutein and zeaxanthin; LA, linoleic acid; ALA,  $\alpha$ -linolenic acid;

ARA, arachidonic acid; DHA, docosahexaenoic acid; EPA, eicosapentaenoic acid.

Supplementary Table S15. Episodic memory tests by group during the intervention for subgroup analysis in Trial 2

|                        | Group        | Baseline       | 12 Weeks          | $\Delta$        | $\Delta$ adjusted |
|------------------------|--------------|----------------|-------------------|-----------------|-------------------|
| <b>Episodic memory</b> |              |                |                   |                 |                   |
| Composite memory       | Placebo      | 93.5 $\pm$ 2.0 | 92.8 $\pm$ 1.8    | -0.6 $\pm$ 1.4  | 0.0 $\pm$ 1.3     |
|                        | LCPUFAs + LZ | 91.3 $\pm$ 1.5 | 95.4 $\pm$ 1.2 ** | 4.1 $\pm$ 1.4 # | 3.7 $\pm$ 1.1 #   |
| Verbal memory          | Placebo      | 49.0 $\pm$ 1.2 | 48.9 $\pm$ 1.2    | -0.1 $\pm$ 0.9  | 0.3 $\pm$ 0.9     |
|                        | LCPUFAs + LZ | 47.6 $\pm$ 0.9 | 50.9 $\pm$ 0.8 ** | 3.2 $\pm$ 0.9 # | 3.0 $\pm$ 0.7 #   |
| Visual memory          | Placebo      | 44.1 $\pm$ 1.1 | 43.4 $\pm$ 1.2    | -0.7 $\pm$ 0.9  | -0.6 $\pm$ 0.8    |
|                        | LCPUFAs + LZ | 43.7 $\pm$ 0.8 | 44.5 $\pm$ 0.7    | 0.8 $\pm$ 0.7   | 0.8 $\pm$ 0.7     |

Mean  $\pm$  SE

Placebo group (n = 24 for composite and verbal memory scores, n = 25 for visual memory score).

LCPUFAs+LZ group (n = 34 for composite and verbal memory scores, n = 35 for visual memory score).

For participants with missing values in episodic memory scores at week 12, baseline values were also removed.

There was no significant difference between groups at the baseline (unpaired Student's *t* -test).

\*\**p* < 0.01 vs. baseline (paired *t* -test).

#*p* < 0.05 vs. placebo (unpaired Student's *t* -test or analysis of covariance by baseline score).

LCPUFAs, long-chain polyunsaturated fatty acids; LZ, lutein and zeaxanthin.
