# Supplementary material for: Effects of Long-Chain Polyunsaturated Fatty Acids in Combination with Lutein and Zeaxanthin on Episodic Memory in Healthy Older Adults
Source: MDPI journal article supplement (doi:10.3390/nu15132825), 2023-06-21
Supplement: s1 [file s1]

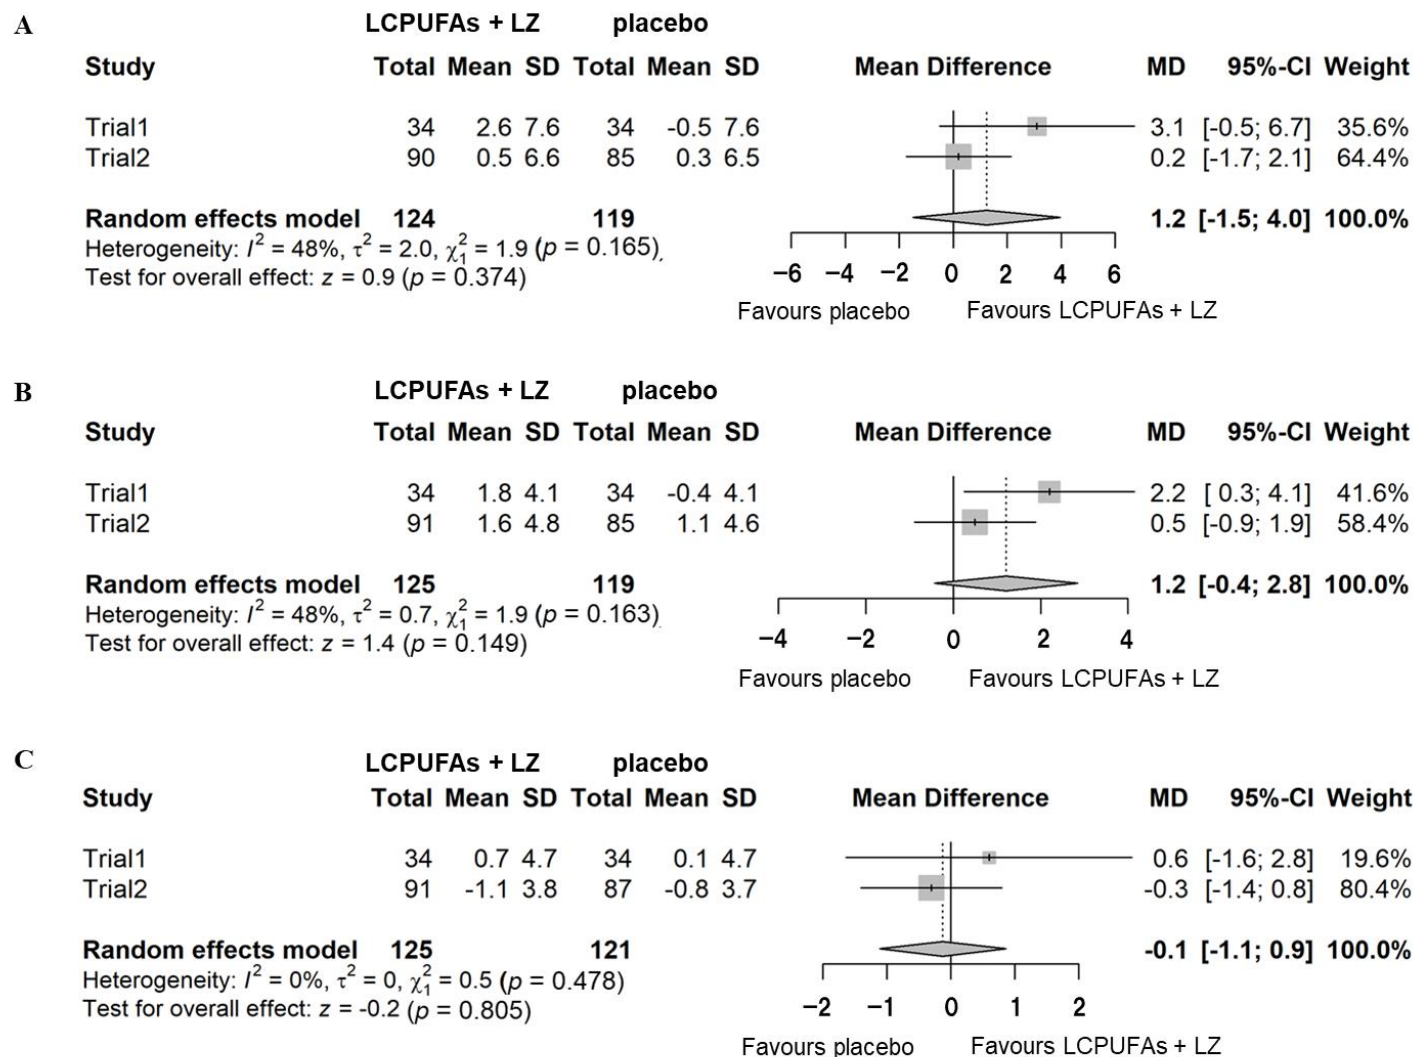

**Figure S1. Combined analysis of the changes ( $\Delta$ -adjusted) in the scores of episodic memory function tests for per-protocol sets in Trials 1 and 2. A, composite memory; B, verbal memory; C, visual memory. LCPUFAs, long-chain polyunsaturated fatty acids; LZ, lutein and zeaxanthin; SD, standard deviation; MD, mean difference; CI, confidence interval.**
